# Supplementary material
Source: Springer Nature journal article supplement (https://www.springermedizin.de/resource/supplementary/12889_2007_1241_MOESM1_ESM.pdf/9502770)
Supplement: MOESM1 [file 9502770]

## APPENDIX: The risk score for DM from the population based SUNSET cohort

| Original risk score <sup>a</sup> |        | Characteristic                                                                                         | Simplified score for practice |   |
|----------------------------------|--------|--------------------------------------------------------------------------------------------------------|-------------------------------|---|
| Alpha                            | -1.638 | Constant                                                                                               |                               |   |
| Beta1X1                          | 0      | age < 45                                                                                               | x1                            | 0 |
|                                  | 0.293  | age ≥ 45 year                                                                                          |                               | 2 |
| Beta2X2                          | 0      | BMI ≤ 25 kg/m <sup>2</sup>                                                                             | x2                            | 0 |
|                                  | 0.317  | BMI > 25 kg/m <sup>2</sup> <sup>b</sup>                                                                |                               | 2 |
| Beta3X3                          | 0      | waist circumference ≤ 80 cm for all women<br>and ≤ 94 cm for black and white European men              | x3                            | 0 |
|                                  | 0.411  | waist circumference > 80 cm for all women<br>and > 94 cm for black and white European men <sup>c</sup> |                               | 2 |
| Beta4X4                          | 0      | resting heart rate < 90 bpm                                                                            | x4                            | 0 |
|                                  | 0.433  | resting heart rate ≥ 90 bpm                                                                            |                               | 2 |
| Beta5X5                          | 0      | no first-degree relative with DM                                                                       | x5                            | 0 |
|                                  | 0.497  | first-degree relative with DM                                                                          |                               | 3 |
| Beta6X6                          | 0      | no hypertension                                                                                        | x6                            | 0 |
|                                  | 0.433  | hypertension <sup>d</sup>                                                                              |                               | 2 |
| Beta7X7                          | 0      | no history of CVD                                                                                      | x7                            | 0 |
|                                  | 0.555  | history of CVD                                                                                         |                               | 3 |
| Beta8X8                          | 0      | ethnic group: Ethnic Dutch                                                                             | x8                            | 0 |
|                                  | -0.084 | African Surinamese                                                                                     |                               | 2 |
|                                  | 0.547  | Hindustani Surinamese                                                                                  |                               | 3 |

<sup>a</sup> Estimated probability of having DM:  $1/1 + e^{-(\alpha + \text{Beta1X1} + \text{Beta2X2} + \text{Beta3X3} + \text{Beta4X4} + \text{Beta5X5} + \text{Beta6X6} + \text{Beta7X7} + \text{Beta8X8})}$

<sup>b</sup> > 23 kg/m<sup>2</sup> for Hindustani Surinamese

<sup>c</sup> >90 cm for Hindustani Surinamese men.

<sup>d</sup> blood pressure > 140/90 mm Hg and/or being on anti-hypertensive therapy.

DM = diabetes mellitus (fasting plasma glucose ≥ 7.0 mmol/l and/or being on anti-diabetic therapy),

BMI= body mass index, bpm= beats per minute, CVD = cardiovascular disease (myocardial infarction and/or stroke)
